# Supplementary material for: An injectable double-network hydrogel for the co-culture of vascular endothelial cells and bone marrow mesenchymal stem cells for simultaneously enhancing vascularization and osteogenesis
Source: Royal Society of Chemistry journal article supplement (doi:10.1039/c8tb02244e), 2018-01-01
Supplement: c8tb02244e1.pdf [file c8tb02244e1.pdf]

## Electronic Supplementary Information (ESI)

### Injectable double-network hydrogel for co-culture of vascular endothelial cells and bone marrow mesenchymal stem cells for simultaneously enhancing vascularization and osteogenesis

Congchong Yang<sup>a</sup>, Bing Han<sup>a</sup>, Chunling Cao<sup>a</sup>, Di Yang<sup>b</sup>, Xiaozhong Qu<sup>\*b</sup> and Xiaoyan Wang<sup>\*a</sup>

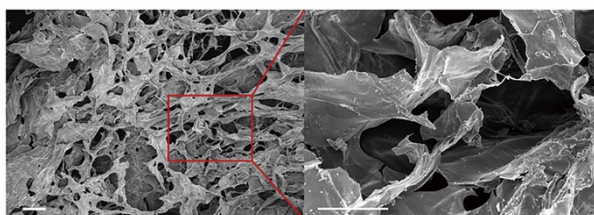

**Fig. S1** Scanning electron microscope (SEM) images of freeze-dried GC/Alg DN hydrogel. Bar, 50  $\mu$ m.

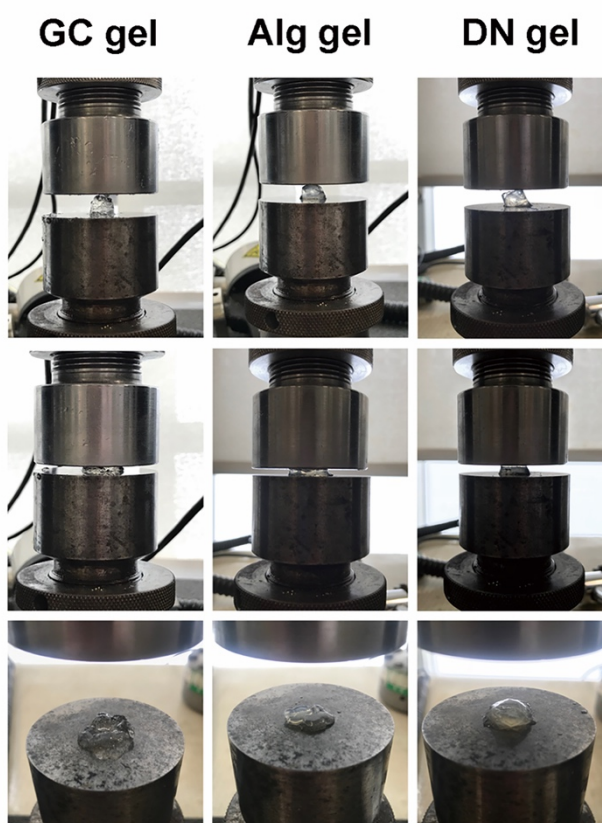

**Fig. S2** Performance of GC, Alg, and GC/Alg DN hydrogels against compressive strain where different modes of failure is seen.
